# Supplementary material
Source: PubMed Central journal article supplement (PMC3926169)
Supplement: Supp_Table1.pdf [file Supp_Table1.pdf]

**Supplemental Table 1.** Primer sequences (shown in 5'-3' orientation) used for PCR and qPCR.

| Gene          | Forward primer            | Reverse primer            | Amplicon size (bp) |
|---------------|---------------------------|---------------------------|--------------------|
| <i>POU5F1</i> | AAGCTGGAGAAGGAGAAGCTG     | AATAGAACCCCCAGGGTGAG      | 158                |
| <i>NANOG</i>  | AGATGCCTCACACGGAGACT      | ACACAGCTGGGTGGAAAGAGA     | 194                |
| <i>FOXA2</i>  | GAAGATGGAAGGGCACGA        | CACGTACGACGACATGTTCA      | 193                |
| <i>SOX17</i>  | CTTTCATGGTGTGGGCTAAGG     | GTACTTGTAGTTGGGGTGGTCCT   | 191                |
| <i>PAX6</i>   | AACAGACACAGCCCTCACAAAC    | CGGGAAGTTGAACTGGAAGTAC    | 275                |
| <i>ISL1</i>   | GCGGAGTGTAATCAGTATTTGGA   | CACTCGATGTGATACACCTTGG    | 184                |
| <i>KDR</i>    | CCAGAAGTAAAAGTAATCCCAGATG | CTTTAAAAGTTCTGCTTCCTCACTG | 246                |
| <i>MEOX1</i>  | AGAGTTTGCCCATCATAACTACCT  | GCTCAGTCCTTAGTCATTTTCCTC  | 238                |
| <i>TUBB3</i>  | TGTACTCCTTCCTGCTGGACTT    | CCCCAACTCTCACTATGTGGAT    | 270                |
| <i>NES</i>    | CAGCGTTGGAACAGAGGTTG      | GGGAATTGCAGCTCCAGCTT      | 289                |
| <i>T</i>      | TGTACTCCTTCCTGCTGGACTT    | CCCCAACTCTCACTATGTGGAT    | 270                |
| <i>GATA4</i>  | TCATCTCACTACGGGCACAG      | GGGAAGAGGGAAGATTACGC      | 233                |
| <i>MIXL1</i>  | GGTACCCCGACATCCACTT       | GGAGCACAGTGGTTGAGGAT      | 166                |
| <i>ACTB</i>   | CTTCCTGGGCATGGAGTCCT      | AGGAGCAATGATCTTGATCTTC    | 202                |
